# Supplementary material for: The Impact of Improving the Quality of the Port’s Infrastructure on the Shippers’ Decisions
Source: MDPI journal article supplement (doi:10.3390/su14106255), 2022-05-20
Supplement: s1 [file s1]

## Supplementary Materials

|           |    | draught | ship* | consignment weight (tonne) | sea freight (USD/tonne) | sea freight (USD/voyage) | transshipment costs (USD/tonne) | transshipment costs (USD/consignment) | hinterland transport costs (USD/tonne) | hinterland transport costs (USD/consignment) | TOTAL COSTS (USD/consignment) | TOTAL COSTS (USD/tonne) |
|-----------|----|---------|-------|----------------------------|-------------------------|--------------------------|---------------------------------|---------------------------------------|----------------------------------------|----------------------------------------------|-------------------------------|-------------------------|
| Route I   | W0 | 8.5 m   | HS    | 18,000                     | 28.8                    | 518,400                  | 5.4                             | 97,361                                | 16.4                                   | 294,459                                      | 910,221                       | 50.6                    |
|           | W1 | 11 m    | HM    | 38,000                     | 20.5                    | 779,000                  | 5.4                             | 205,541                               | 16.4                                   | 621,636                                      | 1,606,177                     | 42.3                    |
| Route II  | W0 | 8.5 m   | HS    | 18,000                     | 36.2                    | 651,600                  | 5.3                             | 94,987                                | 14.8                                   | 265,963                                      | 1,012,550                     | 56.3                    |
|           | W1 | 11 m    | HM    | 38,000                     | 22.2                    | 843,600                  | 5.3                             | 200,528                               | 14.8                                   | 561,478                                      | 1,605,605                     | 42.3                    |
| Route III | W0 | 8.5 m   | HS    | 12,870                     | 23.6                    | 303,732                  | 6.3                             | 81,499                                | 11.9                                   | 152,810                                      | 538,041                       | 41.8                    |
|           | W1 | 11 m    | HM    | 28,500                     | 15.6                    | 444,600                  | 6.3                             | 180,475                               | 11.9                                   | 338,391                                      | 963,465                       | 33.8                    |
|           | W2 | 11 m    | PM    | 53,000                     | 16.6                    | 879,800                  | 6.3                             | 335,620                               | 11.9                                   | 629,288                                      | 1,844,708                     | 34.8                    |
| Route IV  | W0 | 8.5 m   | HS    | 11,600                     | 20.9                    | 242,440                  | 4.2                             | 48,971                                | 20.5                                   | 237,828                                      | 529,239                       | 45.6                    |
|           | W1 | 11 m    | HM    | 25,900                     | 16.0                    | 414,400                  | 4.2                             | 109,340                               | 17.0                                   | 439,352                                      | 963,092                       | 37.2                    |
|           | W2 | 11 m    | PM    | 48,900                     | 12.7                    | 621,030                  | 4.2                             | 206,438                               | 16.8                                   | 823,878                                      | 1,651,346                     | 33.8                    |
| Route V   | W0 | 8.5 m   | HS    | 16,000                     | 13.8                    | 220,800                  | 6.3                             | 101,319                               | 11.5                                   | 183,641                                      | 505,760                       | 31.6                    |
|           | W1 | 11 m    | HM    | 36,600                     | 10.2                    | 373,320                  | 6.3                             | 231,768                               | 11.5                                   | 420,079                                      | 1,025,167                     | 28.0                    |
